# Supplementary material for: Void engineering to promote the self-cleaning properties of bactericidal zinc oxide nanopillar array coatings
Source: Royal Society of Chemistry journal article supplement (doi:10.1039/d5ma00180c), 2025-01-01
Supplement: d5ma00180c1.pdf [file d5ma00180c1.pdf]

Supporting Information

for

**Void engineering to promote the self-cleaning properties of bactericidal zinc oxide  
nanopillar array coatings**

Amir Hassanpour<sup>1\*</sup>, Marie-Christine Groleau<sup>2</sup>, Dalya Messaoudi<sup>1</sup>, Andrea A. Greschner<sup>1</sup>,  
Katharina Kohlmann<sup>1</sup>, Andreas Ruediger<sup>1</sup>, Eric Déziel<sup>2</sup>, Shuhui Sun<sup>1</sup>, and Marc A. Gauthier<sup>1\*</sup>

<sup>1</sup> Institut National de la Recherche Scientifique, Centre Énergie Matériaux Télécommunications,  
Varenes, QC J3X 1P7, Canada

<sup>2</sup> Institut National de la Recherche Scientifique (INRS), Centre Armand-Frappier Santé  
Biotechnologie, Laval, QC H7V 1B7, Canada

To whom correspondence should be addressed: [amir.hassanpour@inrs.ca](mailto:amir.hassanpour@inrs.ca);  
[marc.andre.gauthier@inrs.ca](mailto:marc.andre.gauthier@inrs.ca)

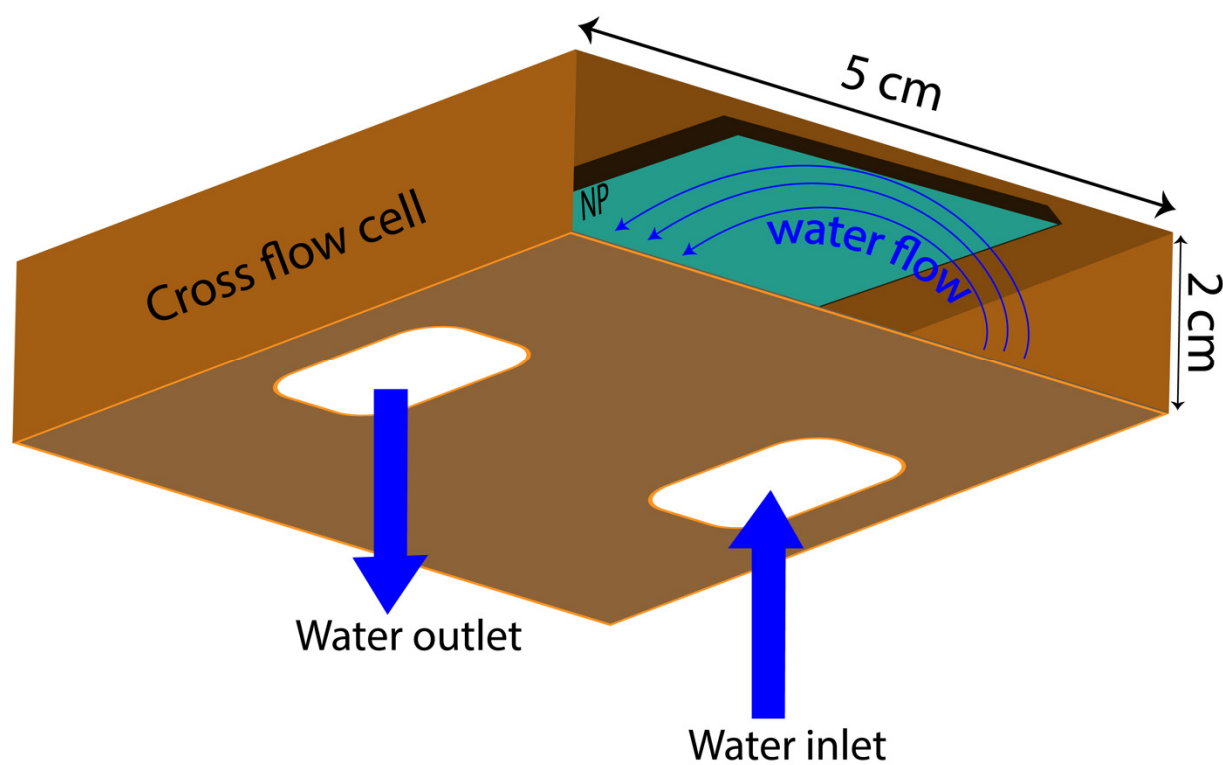

Figure S1. **Illustration of the cross-flow test setup.** The NP coating was exposed to tangential water flow for 6 hours. Tap water (Varennnes, QC) with a pH of 7, pressure: 100 kPa, water flow rate 0.8–1 L/min, and temperature of 25 °C.

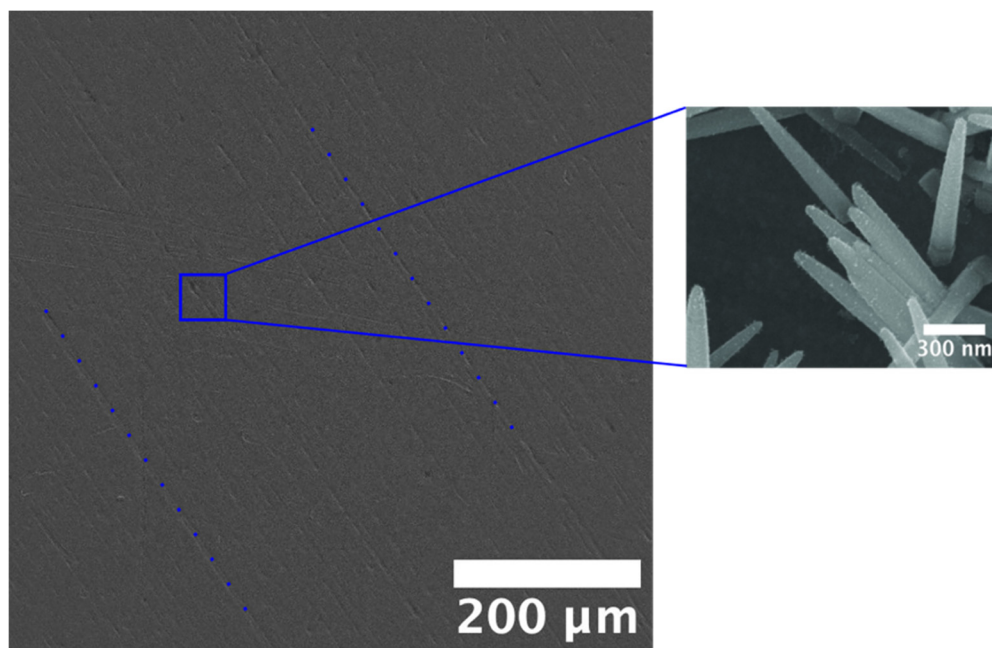

**Figure S2. SEM images of NP coating after exposure to 6-h high-pressure tangential water flow.** The blue dots show the groove, created by high-pressure tangential water flow. The inset shows the high-resolution image of the small area of NP coating.
